# Supplementary material
Source: Springer Nature journal article supplement (https://www.springermedizin.de/resource/supplementary/12936_2007_386_MOESM1_ESM.pdf/9547692)

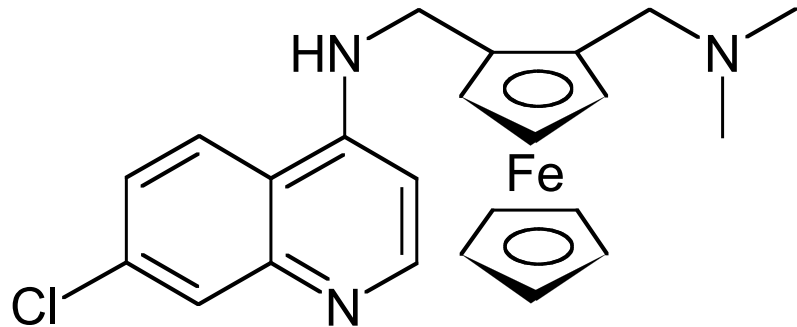

Ferroquine

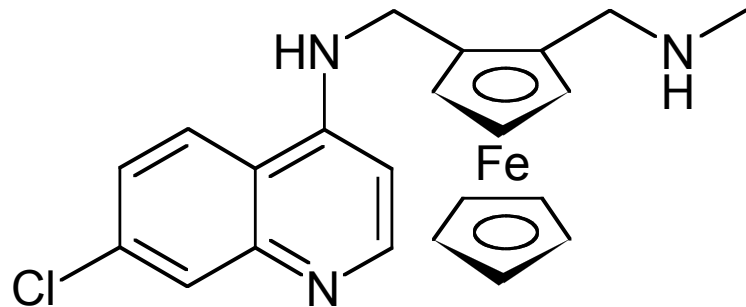

Ferroquine metabolite

Supplement: MOESM1 [file 9547692]
